# Supplementary material
Source: Springer Nature journal article supplement (https://www.springermedizin.de/resource/supplementary/12865_2009_279_MOESM6_ESM.pdf/9427662)

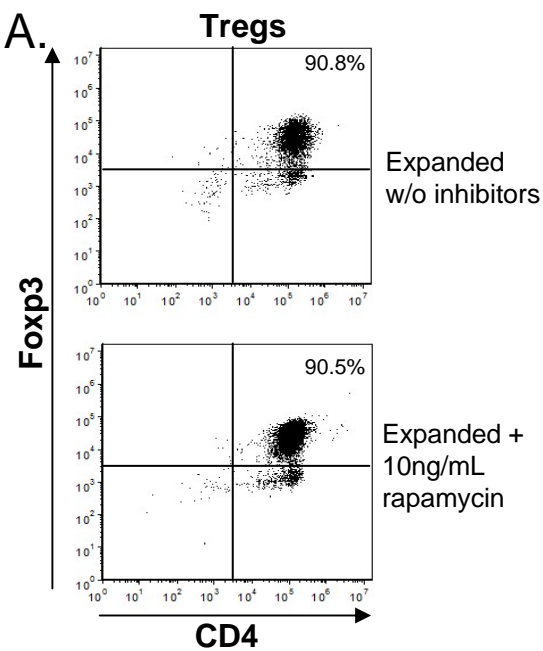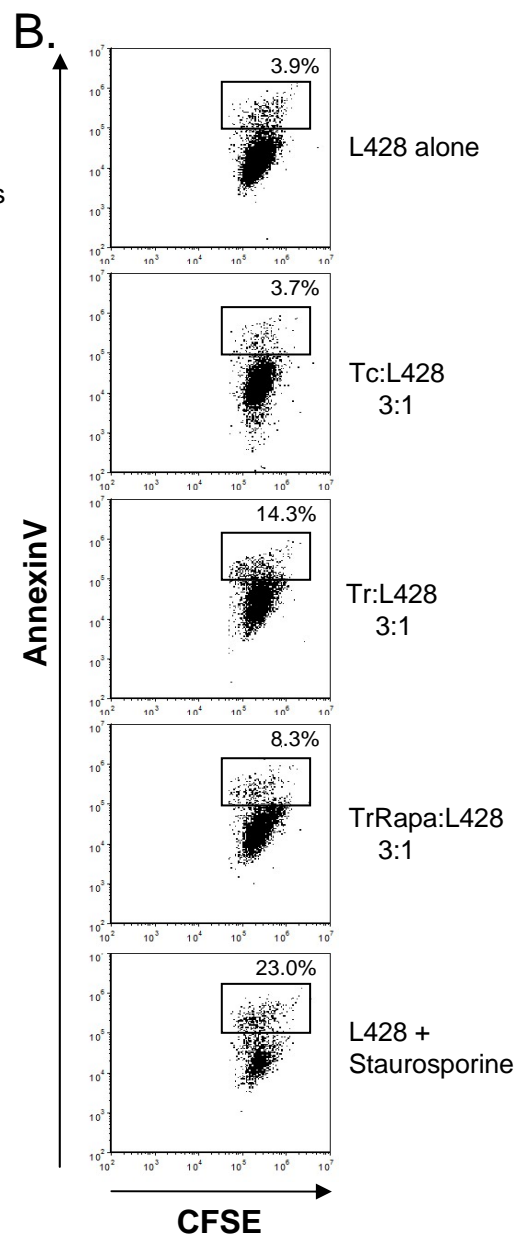

**6 Hours co-incubation**

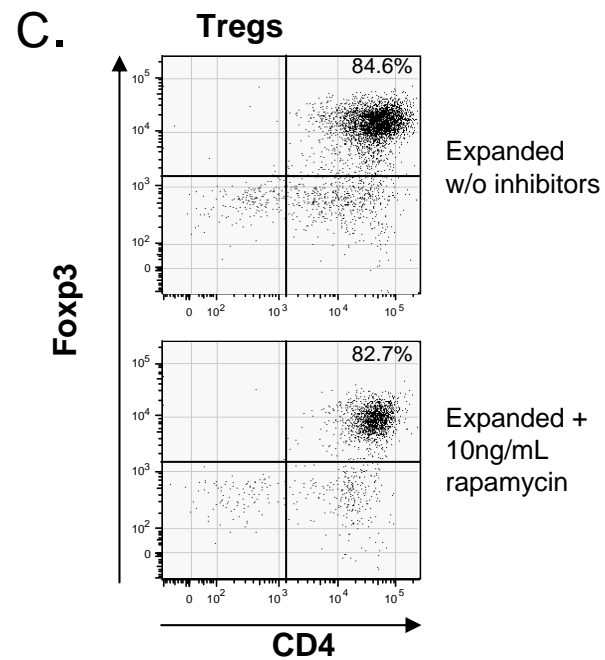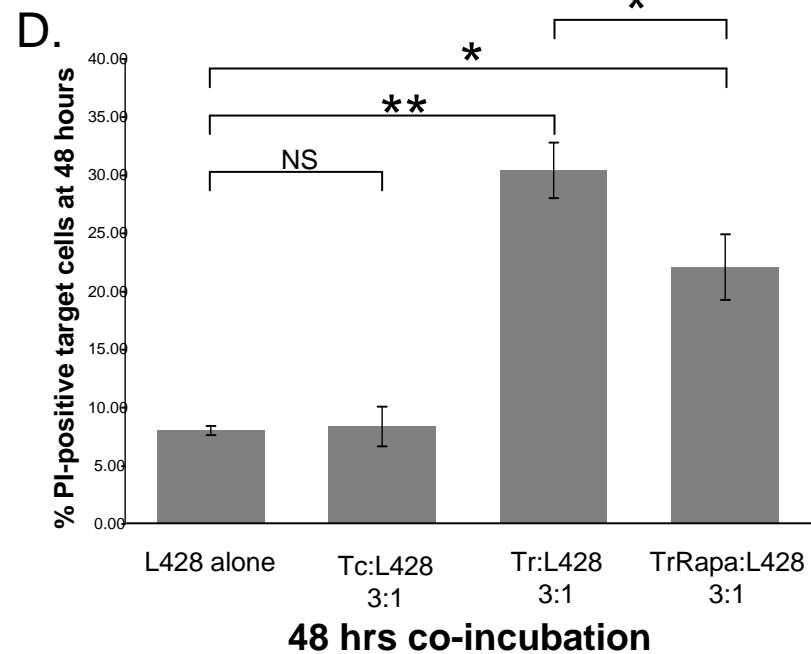

Supplement: MOESM6 [file 9427662]
